# Supplementary material for: Comparison of MicroRNA Profiles in Extracellular Vesicles from Small and Large Goat Follicular Fluid
Source: MDPI journal article supplement (doi:10.3390/ani11113190), 2021-11-08
Supplement: s1 [file s1]

Supplementary materials

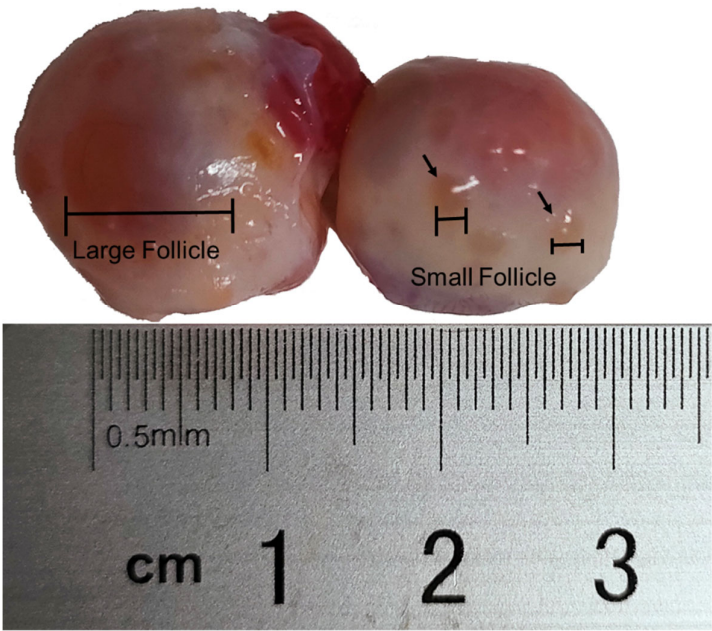

Figure S1. Small or large follicles selected from goat ovaries. Small follicles < 3 mm and large follicles > 5 mm in diameter.

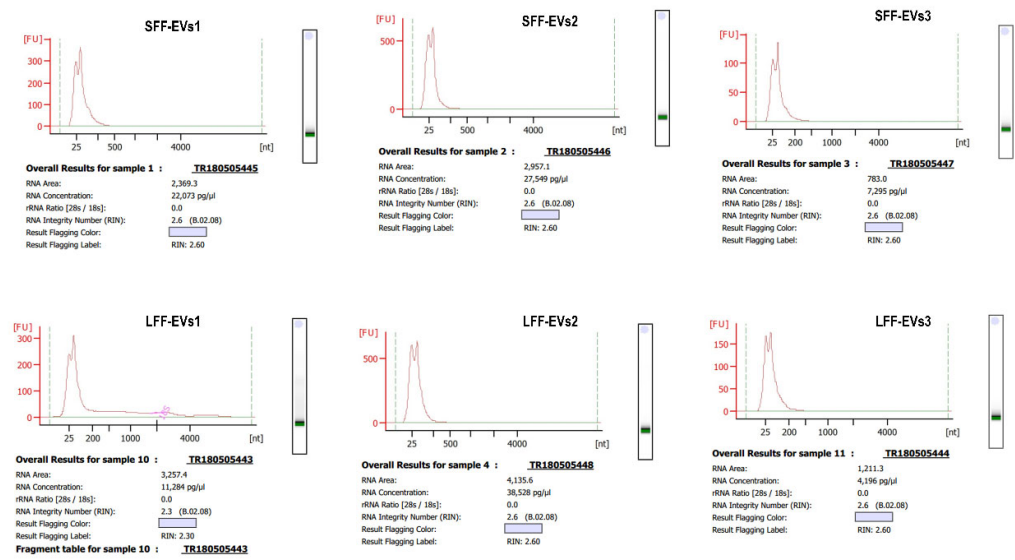

Figure S2 The length distribution and quality test of small RNAs in EVs

**Table S1. The Summary of sRNA data output and filter**

| Sample            | SFF      |          |          | LFF      |          |          |
|-------------------|----------|----------|----------|----------|----------|----------|
|                   | SFF-EVs1 | SFF-EVs2 | SFF-EVs3 | LFF-EVs1 | LFF-EVs2 | LFF-EVs3 |
| Raw Reads         | 13684470 | 14524981 | 13746996 | 15822734 | 13377814 | 14095802 |
| Bases             | 0.684G   | 0.726G   | 0.687G   | 0.791G   | 0.669G   | 0.705G   |
| Error rate        | 0.01%    | 0.01%    | 0.01%    | 0.01%    | 0.01%    | 0.01%    |
| Q20               | 98.18%   | 98.08%   | 97.58%   | 98.15%   | 97.79%   | 98.07%   |
| Q30               | 95.83%   | 95.61%   | 94.58%   | 95.83%   | 95.08%   | 95.60%   |
| GC content        | 52.39%   | 53.09%   | 54.38%   | 51.61%   | 52.50%   | 51.96%   |
| N% > 10%          | 96       | 91       | 99       | 98       | 101      | 106      |
| low quality       | 207247   | 236906   | 231421   | 233710   | 168902   | 224510   |
|                   | (1.51%)  | (1.63%)  | (1.68%)  | (1.48%)  | (1.26%)  | (1.59%)  |
| 5 adapter         | 1885     | 3700     | 9424     | 952      | 1465     | 1713     |
| contaminate       | (0.01%)  | (0.03%)  | (0.07%)  | (0.01%)  | (0.01%)  | (0.01%)  |
| 3 adapter null or | 317022   | 1261551  | 1200198  | 496030   | 520645   | 433209   |
| insert null       | (2.32%)  | (8.69%)  | (8.73%)  | (3.13%)  | (3.89%)  | (3.07%)  |
| with              | 1447     | 4234     | 7374     | 2268     | 3246     | 2289     |
| polyA/T/G/C       | (0.01%)  | (0.03%)  | (0.05%)  | (0.01%)  | (0.02%)  | (0.02%)  |
| clean reads       | 13156773 | 13018499 | 12298480 | 15089676 | 12683455 | 13433975 |
|                   | (96.14%) | (89.63%) | (89.46%) | (95.37%) | (94.81%) | (95.30%) |

**Table S2. The miRNA primers sequences were used in this study**

|                         | miRNAs          | Primer sequences (5'-3')                            |
|-------------------------|-----------------|-----------------------------------------------------|
| Stem-loop<br>RT primers | >chi-miR-202-5p | GTCGTATCCAGTGCAGGGTCCGAGGTATTTCGCACTGGATACGACAAAGAA |
|                         | >chi-miR-424-5p | GTCGTATCCAGTGCAGGGTCCGAGGTATTTCGCACTGGATACGACTCAAAA |
|                         | >chi-miR-25-3p  | GTCGTATCCAGTGCAGGGTCCGAGGTATTTCGCACTGGATACGACTCAGAC |
|                         | >chi-miR-22-3p  | GTCGTATCCAGTGCAGGGTCCGAGGTATTTCGCACTGGATACGACGTTCTT |
|                         | >chi-miR-126-3p | GTCGTATCCAGTGCAGGGTCCGAGGTATTTCGCACTGGATACGACGCATTA |
|                         | >chi-miR-26a-5p | GTCGTATCCAGTGCAGGGTCCGAGGTATTTCGCACTGGATACGACAGCCTA |
|                         | >chi-miR-191-5p | GTCGTATCCAGTGCAGGGTCCGAGGTATTTCGCACTGGATACGACAGCTGC |
|                         | Cel-miRNA-39    | GTCGTATCCAGTGCAGGGTCCGAGGTATTTCGCACTGGATACGACCAAGCT |
| qPCR<br>primers         | qPCR>miR-202-5p | GCGGGCTTCCTATGCATATACT                              |
|                         | qPCR>miR-424-5p | GCGGGCCAGCAGCAATTCATGT                              |
|                         | qPCR>miR-25-3p  | TGCCCCGATTGCACTTGTCTC                               |
|                         | qPCR>miR-22-3p  | ACGGGCAAGCTGCCAGTTGAA                               |
|                         | qPCR>miR-126-3p | CGGGCTCGTACCGTGAGTAATA                              |
|                         | qPCR>miR-26a-5p | GCGGGCTTCAAGTAATCCAGGA                              |
|                         | qPCR>miR-191-5p | GGGCAACGGAATCCCAAAA                                 |
|                         | Cel-miRNA-39    | TCACCGGGTGTAATCAGCT                                 |
|                         | UR R            | CAGTGCAGGGTCCGAGGT                                  |
